# Supplementary material
Source: publisher site journal article supplement (https://www.dovepress.com/article/391463)
Supplement: Supplementary file 1 [file get_supplementary_file.php]

Supplementary Table 1 Summary of literatures of GPP treated with adalimumab.

| **Literature** | **Research type** | **Case number** | **Age (ys)/Sex** | **Combined with other types of psoriasis** | **Treatment**  **before**  **adalimumab** | **Adalimumab scheme** | **Combination treatment** | **Treatment results** | **Side effects** |
| --- | --- | --- | --- | --- | --- | --- | --- | --- | --- |
| Callen et al. 2005 6 | Case report | 1 | 17/F | PV and PA | Oral ciclosporin 400 mg per day, oral methotrexate 20 mg per week and oral isotretinoin 40 mg per day, but failed | 40mg every other week | oral MTX 20 mg weekly, and oral ciclosporin 400 mg daily. | Five months later, methotrexate and ciclosporin stopped. She continues on adalimumab 40 mg every otherc week. Her psoriasis was essentially clear with only minimal nail involvement | NA |
| Zangrilli et al. 2008 7 | Case report | 1 | 50/F | PA | methotrexate, etretinate, acitretin, cyclosporine and prednisone, infliximab, etanercep, with initial improvement but with no long-term efficacy. | 40mg/1 week | None | After the first 4 weeks of treatment an improvement was observed, the disease was stable after 72 weeks of continuous treatment | No side-effects were seen |
| Kimura et al. 2012 8 | Case report | 1 | 36/F | PV and PA | Topical clobetasol propionate ointments and oral celecoxib at 400 mg⁄ day, but ineffective | The initial dose was 80mg, and then decreased to 40 mg every other week | None | No relapses have been observed subsequently. | No |
| Gallo et al. 2013 9 | Case report | 1 | 21/F | None | Cyclosporin (3 mg/kg/d) was ineffective; acitretin (50 mg/d), achieved a partial improvement; PUVA+acitretin, a partial response; Oral MTX, unsuccessful; infliximab, effecacy decreased progressively and relapses occurred | 80 mg at baseline, 40 mg at week 1, and then 40 mg every two weeks | Oral acitretin (50 mg/d) | After 11 months of continuous treatment, the patient’s psoriasis remains well controlled despite the progressive reduction of the acitretin dose (to 30 mg/d). | NA |
| Kawakami et al. 2015 10 | Case report | 2 | Case 1: 43/M;  Case 2: 30/F | NA | Infliximab, but unresponsive | 80mg every other week | Oral MTX 5mg/week | Case 1:no further flaring of the symptoms was observed up to week 97 of ADA therapy.  Case 2: no remarkable deterioration was observed up to week 64 of the follow-up period. | NA |
| Gkalpakiotis et al. 2015 11 | Case report | 1 | 80/F | PV | Oral methotrexate 10 mg, but progression of the disease was very fast | The initial dose was 80mg, second dose was 40mg | Oral MTX 15 mg/week | Favorable response | NA |
| Matsumoto et al. 2017 12 | Case report | 4 | Case 1: 70/F;  Case 2: 36/F;  Case 3: 56/M  Case 4： 43/M | Case 1: None  Case 2: PV  Case 3: PV+PA  Case 4: PV+PA | Case 1: Cyclosporine, etretinate, infliximab;  Case 2: PUVA, NB-UVB, cyclosporine, infliximab;  Case 3: MTX, cyclosporin, etretinate, infliximab;  Case 4: MTX, cyclosporin, NB-UVB, infliximab.  Infliximab was effective for the first several months but failed after 4-33 months | Case 1-3: 80 mg/2 weeks;  Case 4: 40mg/2 weeks | None | All patients had a good response | NA |
| Morita et al. 2018 13 | A phase 3, multicenter, open-label study | 10 | 49.8 ± 13.3, 7M | NA | 1 case PUVA；2 cases NB-UVB; 2 cases granulocyte and monocyte absorbent apheresis; 3 cases infliximab | 80 mg at week 0 followed by adalimumab 40 mg every other week (option to escalate to 80 mg when necessary) | 7 patients took one or more concomitant systemic medications (etretinate, n = 3; cyclosporin, n = 2; methotrexate, n = 2; oral corticosteroids, n = 1) and 7 patients used topical corticosteroids | Adalimumab was effective for up to 52 weeks in the treatment of Japanese patients with GPP, even in those who had not been responding to previous infliximab treatment, and no new safety risks were identified. | well tolerated |

**Abbreviations:** GPP, generalized pustular psoriasis; M, male; F, female; NA, not available; MPD, minimal phototoxic dose; PV, psoriasis vulgaris；PA, psoriatic arthritis; PUVA, psoralen + ultraviolet A (PUVA); 8-MOP, 8-methoxypsoralen; NB-UVB, narrowband ultraviolet B; MTX, methotrexate;

Supplementary Table 2 Summary of cases of GPP treated with ultraviolet phototherapy.

| **Literature** | **Number of patients** | **Sex** | **Age** | **Duration of the disease before ultraviolet phototherapy** | **primary skin**  **disease** | **Patients condition** | **Treatment**  **before**  **ultraviolet**  **phototherapy** | **Ultraviolet**  **Phototherapy**  **scheme** | **Dose and course of Ultraviolet phototherapy** | **combination treatment** | **Treatment results** | **Side effects** |
| --- | --- | --- | --- | --- | --- | --- | --- | --- | --- | --- | --- | --- |
| Hönigsmann et al. 1977 21 | 8 | NA | 4-32 years | 10±9 years | GPP | covering more than 50% of the body face; all had fever, chills; Two had severe postulation of the fingers including nail bed and nail folds | Systemic  corticosteroids  / azathioprine  / methotrexate | PUVA  Initial frequency: 4/week  Maintenance stage: 2/week to 1/week, or less frequently | 8-MOP (0.6mg/Kg)  Initial dose: 1.0-5.0 J/cm2  No. of exposures: 5-30 times  Total dose: 13.8-124.9 J/cm2  Total course: 8-56 day | Systemic  corticosteroids  /azathioprine  / methotrexate | All patients complete clearing, 7 patients kept complete remission by maintenance therapy for period 1.5 years | Pruritus during the initial phase and usually mild,  One patient had nausea |
| Hunt et al. 1997 22 | 1 | F | 34 years | 1 week | Psoriasis since the age of 10 years | covering trunk, limbs, face, palms, and soles; with fever | None | PUVA  Initial frequency: 5/week  maintenance frequency: 3/week | 8-MOP (0.5mg/Kg)  starting dose: 0.5 J/cm2, increased by 0.2 J/cm2 each treatment to a maximum of 1.0 J/cm2, after 4 weeks, slowly increasing up to 3.0 J/cm2  Total course: 10 months | Cyclosporine (6mg/kg/day) | The patient remained in remission 12 months after cessation of therapy | No side effects |
| Ozawa et al.  1999 23 | 89 | NA | 37.4±18.7 years | NA | Some had PV before | Some patients had fever or joint pain, but no exact details. | NA | PUVA  Frequency: 1-3/week | 40mg 8-MOP  Initial dose: less than MPD  gradually increased with each treatment up to 2 to 3 MPD | retinoid | The effective rate was 45.7%, more effective in patients without a previous history of PV (effective rate: 54.5%) | Side effects were recognized in 13 (16.05%), lower than those treated with retinoid. |

**Abbreviations:** GPP, generalized pustular psoriasis; M, male; F, female; NA, not available; MPD, minimal phototoxic dose; PV, psoriasis vulgaris；PUVA, psoralen + ultraviolet A (PUVA); 8-MOP, 8-methoxypsoralen;
